1 **Systematic analysis of naturally occurring insertions and deletions that alter**  
2 **transcription factor spacing identifies tolerant and sensitive transcription**  
3 **factor pairs**

4  
5 Zeyang Shen<sup>1,2</sup>, Rick Z. Li<sup>1</sup>, Thomas A. Prohaska<sup>3</sup>, Marten A. Hoeksema<sup>1</sup>, Nathan J. Spann<sup>1</sup>,  
6 Jenhan Tao<sup>1</sup>, Gregory J. Fonseca<sup>1,4</sup>, Thomas Le<sup>5</sup>, Lindsey Stolze<sup>6</sup>, Mashito Sakai<sup>1,7</sup>, Casey E.  
7 Romanoski<sup>6</sup>, Christopher K. Glass<sup>1,3\*</sup>

8  
9 <sup>1</sup>Department of Cellular and Molecular Medicine, School of Medicine, University of California  
10 San Diego, La Jolla, CA 92093, USA

11 <sup>2</sup>Department of Bioengineering, Jacobs School of Engineering, University of California San  
12 Diego, La Jolla, CA 92093, USA

13 <sup>3</sup>Department of Medicine, School of Medicine, University of California San Diego, La Jolla, CA  
14 92093, USA

15 <sup>4</sup>Department of Medicine, McGill University, Montreal, Quebec, Canada

16 <sup>5</sup>Division of Biological Sciences, University of California San Diego, La Jolla, CA 92093, USA

17 <sup>6</sup>Department of Cellular and Molecular Medicine, College of Medicine, University of Arizona,  
18 Tucson, AZ 85721, USA

19 <sup>7</sup>Department of Biochemistry and Molecular Biology, Nippon Medical School, 1-1-5 Sendagi,  
20 Bunkyo-ku, Tokyo 113-8602, Japan

21 \*Corresponding author. E-mail: [ckg@ucsd.edu](mailto:ckg@ucsd.edu)

22  
23 **Abstract**

24 Regulation of gene expression requires the combinatorial binding of sequence-specific  
25 transcription factors (TFs) at promoters and enhancers. Prior studies showed that alterations in  
26 the spacing between TF binding sites can influence promoter and enhancer activity. However,  
27 the relative importance of TF spacing alterations resulting from naturally occurring insertions  
28 and deletions (InDels) has not been systematically analyzed. To address this question, we first  
29 characterized the genome-wide spacing relationships of 75 TFs in K562 cells as determined by  
30 ChIP-sequencing. We found a dominant pattern of a relaxed range of spacing between  
31 collaborative factors, including 46 TFs exclusively exhibiting relaxed spacing with their binding  
32 partners. Next, we exploited millions of InDels provided by genetically diverse mouse strains  
33 and human individuals to investigate the effects of altered spacing on TF binding and local

34 histone acetylation. Spacing alterations resulting from naturally occurring InDels are generally  
35 tolerated in comparison to genetic variants directly affecting TF binding sites. A remarkable  
36 range of tolerance was further established for PU.1 and C/EBP $\beta$ , which exhibit relaxed spacing,  
37 by introducing synthetic spacing alterations ranging from 5-bp increase to >30-bp decrease using  
38 CRISPR/Cas9 mutagenesis. These findings provide implications for understanding mechanisms  
39 underlying enhancer selection and for the interpretation of non-coding genetic variation.

40

## 41 **Introduction**

42 Genome-wide association studies (GWASs) have identified thousands of genetic variants  
43 associated with diseases and other traits (MacArthur et al., 2017; Visscher et al., 2017). Single  
44 nucleotide polymorphisms (SNPs) and short insertions and deletions (InDels) represent common  
45 forms of these variants. The majority of GWAS variants fall at non-protein-coding regions of the  
46 genome, implicating their effects on gene regulation (Farh et al., 2015; Ward & Kellis, 2012).  
47 Gene expression is regulated by transcription factors (TFs) in a cell-type-specific manner. TFs  
48 bind to short, degenerate sequences at promoters and enhancers, often referred to as TF binding  
49 motifs. Active promoters and enhancers are selected by combinations of sequence-specific TFs  
50 that bind in an inter-dependent manner to closely spaced motifs. SNPs and InDels can create or  
51 disrupt TF binding motifs and are a well-established mechanism for altering gene expression and  
52 biological function (Behera et al., 2018; Deplancke et al., 2016; Grossman et al., 2017; Heinz et  
53 al., 2013). InDels can additionally change spacing between motifs, but it remains unknown the  
54 extent to which altered spacing is relevant for interpreting genetic variation in human  
55 populations or between animal species.

56

57 Previous studies reported two major categories of motif spacing between inter-dependent TFs  
58 (Slattery et al., 2014). One category refers to the enhanceosome model (Slattery et al., 2014) that  
59 requires specific or “constrained” spacing. It is mainly provided by TFs that form ternary  
60 complexes recognizing composite binding motifs, exemplified by GATA, Ets and E-box  
61 transcription factors in mouse hematopoietic cells (Ng et al., 2014), MyoD and other cell-type-  
62 specific factors in muscle cells (Nandi et al., 2013), Sox2 and Oct4 in embryonic stem cells  
63 (Rodda et al., 2005). In vitro studies of the binding of pair-wise combinations of ~100 TFs to a  
64 diverse library of DNA sequences identified 315 out of 9400 possible interactive TF pairs that  
65 select composite elements with constrained positions of the respective recognition motifs (Jolma  
66 et al., 2015). Constrained spacing required for the optimal binding and function of interacting  
67 TFs can also occur between independent motifs, such as occurs at the interferon- $\beta$  enhanceosome  
68 (Panne, 2008). In comparison to constrained spacing, another category of motif spacing allows  
69 TFs to interact over a relatively broad range (e.g., 100-200 bp), which we call “relaxed” spacing  
70 and is equivalent to the billboard model (Slattery et al., 2014). This type of spacing relationship  
71 is observed in collaborative or co-occupied TFs that do not target promoters or enhancers as a  
72 ternary complex (Heinz et al., 2010; Jiang & Singh, 2014; Sönmezer et al., 2021).

73

74 Substantial evidence indicates that the two categories of spacing requirement can experience a  
75 different level of impact from genetic variation. Reporter assays examining synthetic alterations  
76 of motif spacing revealed examples of TFs that require constrained spacing and have high  
77 sensitivity of transcription factor binding and gene expression on spacing (Farley et al., 2015; Ng  
78 et al., 2014; Panne, 2008). On the contrary, flexibility in motif spacing has been demonstrated  
79 using reporter assays in *Drosophila* (Menoret et al., 2013) and HepG2 cells (Smith et al., 2013).

80 However, these studies did not distinguish the impact of altered spacing on transcription factor  
81 binding or subsequent recruitment of co-activators required for gene activation. Moreover, it  
82 remains unknown the extent to which these findings are relevant to spacing alterations resulting  
83 from naturally occurring genetic variation.

84

85 To investigate the effects of altered spacing on TF binding and function, we first characterized  
86 the genome-wide binding patterns of seventy-five TFs based on their binding sites determined by  
87 chromatin immuno-precipitation sequencing (ChIP-seq). We developed a computational  
88 framework that assigned each spacing relationship to “constrained” or “relaxed” category and  
89 associated spacings to the naturally occurring InDels observed in human populations to study the  
90 selective constraints of different spacing relationships. As specific case studies, we leveraged  
91 natural genetic variation in numerous human samples and from five strains of mice to study the  
92 effect size of spacing alterations on TF binding activity and local histone acetylation. We find  
93 that InDels altering spacing are generally less constrained and well tolerated when they occur  
94 between TF pairs with relaxed spacing relationships. Finally, we established remarkable  
95 tolerance in spacing for macrophage lineage determining TFs (LDTFs), PU.1 and C/EBP $\beta$ , by  
96 introducing a wide range of InDels between their respective binding sites at representative  
97 endogenous genomic loci using CRISPR/Cas9 mutagenesis in mouse macrophages.

98

## 99 **Results**

### 100 **Transcription factors primarily co-bind with relaxed spacing**

101 We characterized spacing relationships for 75 TFs of K562 cells covering diverse TF families  
102 (Hu et al., 2019) based on the ChIP-seq data from ENCODE data portal (Davis et al., 2018).

103 After obtaining reproducible TF binding sites, we first used the corresponding position weight  
104 matrix (PWM) of each TF (Figure 1-table supplement 1) to scan through the sequence of every  
105 binding site and identified the locations of high-affinity motifs that are less than 50 bp from  
106 ChIP-seq peak centers (Fig. 1A; Figure 1-figure supplement 1). The binding sites of every pair of  
107 TFs were then merged to compute the edge-to-edge motif spacing at all the co-binding sites.  
108 Motif spacings were eventually aggregated to show a distribution within +/- 100 bp. To  
109 categorize spacing relationships, we used permutation tests on the gradients to test for specific  
110 spacing constraints and used Kolmogorov–Smirnov test (KS test) to test for a relaxed spacing  
111 relationship against random distribution.

112

113 We applied this computational framework to all possible pairs of TFs. By dissecting each TF's  
114 binding sites based on their spacing relationships with co-binding TFs, we found that 46 of the  
115 75 TFs examined exclusively exhibited relaxed spacing relationships with other TFs (Fig. 1B).  
116 26 factors could participate in either relaxed or constrained interactions, depending on the  
117 specific co-binding TFs. Only 3 TFs interacted with only constrained spacing, some of which  
118 might show additional relaxed spacing relationships by expanding the current set of TFs. The  
119 significant pairwise patterns of relaxed and constrained spacing relationships are illustrated in  
120 Figure 1C. Among 32 TF pairs with constrained spacing relationships, most bind closely to each  
121 other within 15 bp spacing (Figure 1-figure supplement 2; Figure 1-table supplement 2). Some of  
122 these TF pairs have been reported to recognize composite motifs such as GATA1-TAL1 and  
123 NFATC3-FOSL1 (Macián et al., 2001; Ng et al., 2014) (Fig. 1D; Figure 1-figure supplement 3),  
124 and some are novel constrained spacing patterns discovered by our analysis such as MEF2A-  
125 JUND and CEBPB-TEAD4 (Figure 1-figure supplement 3). There are also TF pairs, exemplified

126 by EGR1 and JUND, that bind relatively further away from each other but still require  
127 constrained spacing (Fig. 1D). Previous studies demonstrated interactions between EGR1 and  
128 AP-1 factors (Levkovitz & Baraban, 2002; Nakashima et al., 2003), but the underlying  
129 mechanism for such constrained spacing at 29 bp needs to be further investigated. TFs exhibiting  
130 relaxed spacing are exemplified by ETV1-TAL1 and JUND-KLF16, in which the frequency of  
131 co-binding progressively declines with distance from the center of the reference TF (Fig. 1D). In  
132 addition, the same type of spacing relationship is usually observed in different motif orientations  
133 (Fig. 1D), consistent with previous findings (Lis & Walther, 2016). The same TF pairs can have  
134 similar spacing relationships in different cell types, exemplified by CEBPB and JUND in K562  
135 and HepG2 cells (Figure 1-figure supplement 4).

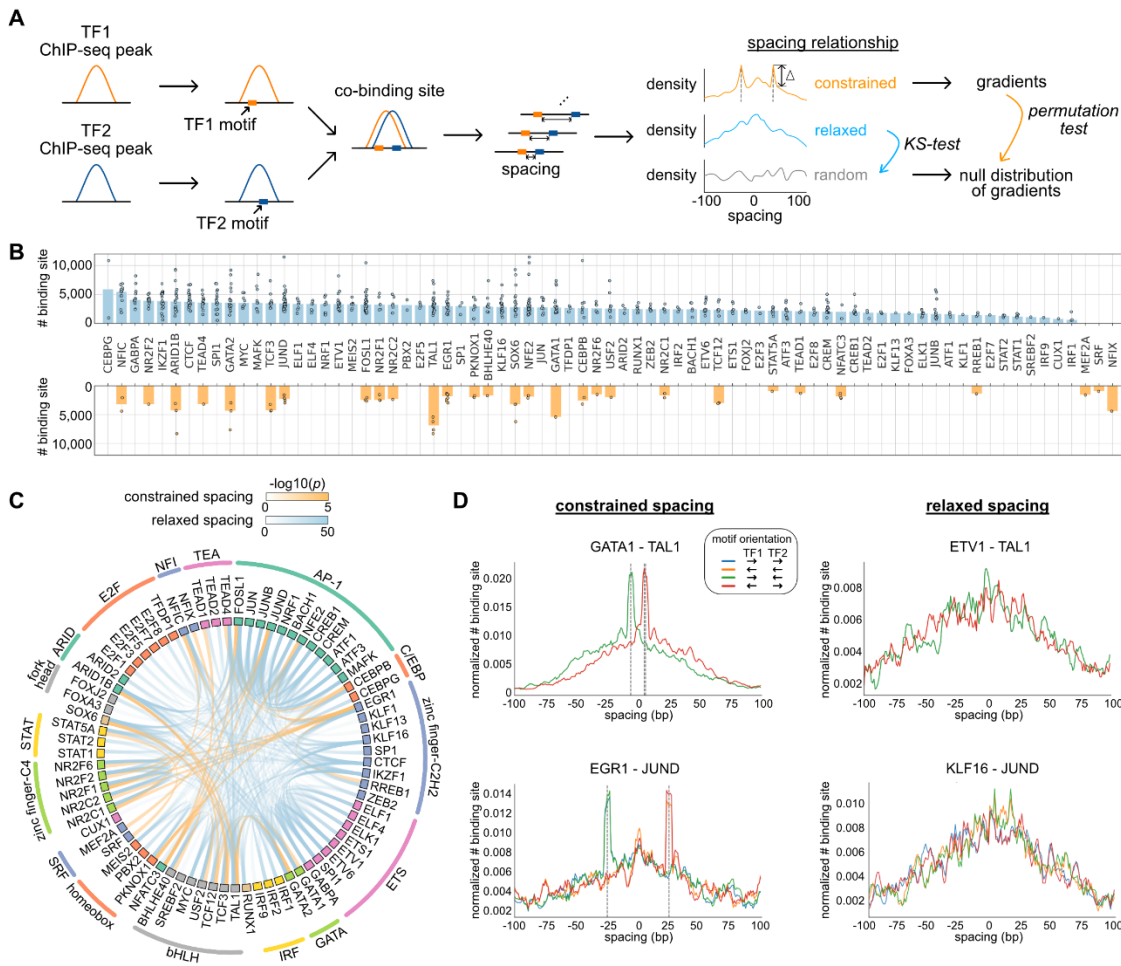

136

137 **Figure 1. Characterization of spacing relationships for transcription factor pairs.** (A) Schematic of data  
138 analysis pipeline for characterizing the spacing relationships based on TF ChIP-seq data. (B) Dissection of TF  
139 binding sites for TFs in K562 cells based on spacing relationships with co-binding TFs. Each dot represents the co-  
140 binding peak number of the corresponding TF and one of its co-binding TFs. Bar heights indicate means among the  
141 co-binding TFs. (C) Circos plot summarizing spacing relationships for all the TF pairs analyzed. Orange and blue  
142 bands represent significant constrained and relaxed spacing relationships, respectively. Color opacity indicates the  
143 level of significance. TFs are grouped and colored by TF family. (D) The spacing distributions of example TF pairs  
144 with constrained spacing or relaxed spacing relationships. Dashed lines indicate the significant constrained spacings.  
145 Since TAL1 motif is completely palindromic, the motif orientation is only differentiated by its co-binding partners.

146

147 **Natural genetic variants altering spacing between relaxed transcription factors are**  
148 **associated with less deleteriousness in human populations**

149 Based on a global view of the TF spacing relationships, we then studied whether these  
150 relationships associate with different levels of sensitivity to spacing alterations. Here, we  
151 leveraged more than 60 million InDels from gnomAD data (Karczewski et al., 2020), which  
152 were based on more than 75,000 genomes from unrelated individuals. We overlaid these InDels  
153 at motifs, between motifs, or within background regions of representative TF pairs of constrained  
154 and relaxed spacing relationships. We found that InDels at different regions have relatively  
155 similar distributions of InDel sizes with the majority being less than 5 bp (Fig. 2A). Next, we  
156 divided these InDels based on the allele frequency (AF) and the allele count (AC) into high-  
157 frequency variants (AF > 0.01%), rare variants (AF < 0.01%, AC > 1), and singletons (AC = 1).  
158 Most of the InDels at TF binding sites are singletons or rare variants (Figure 2-figure supplement  
159 1). We compared the enrichment of these categories of InDels between TFs with different  
160 spacing relationships (Fig. 2B). The InDel compositions at motifs were not significantly different  
161 between constrained and relaxed spacing groups. On the contrary, singletons were significantly  
162 more enriched between motifs with constrained spacing, whereas high-frequency variants were  
163 significantly more depleted between these motifs. We also computed for several TF pairs with  
164 random spacing relationships as negative controls and found similar enrichments of InDels like  
165 those with relaxed spacing. Since common variants are associated with less deleteriousness and  
166 rare variants with more deleteriousness (Lek et al., 2016), our data suggest that InDels between  
167 motifs of TFs with constrained spacing could be just as damaging as those at motifs whereas  
168 InDels between motifs of TFs with relaxed spacing might have a much weaker effect.



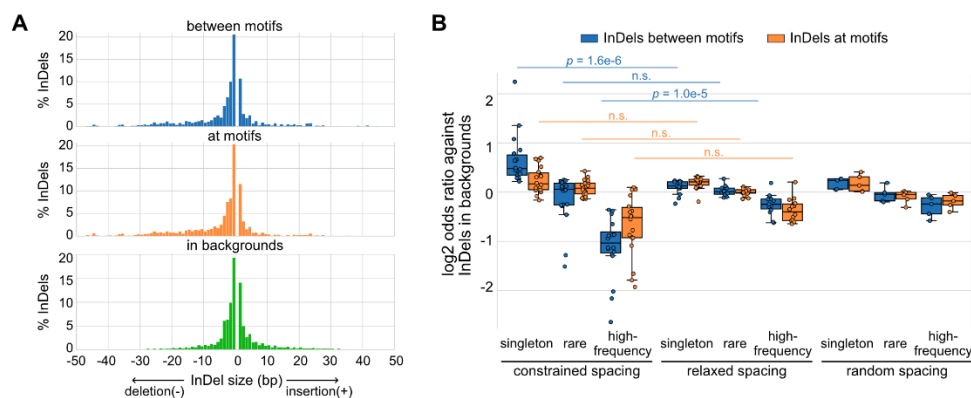

169

170 **Figure 2. Naturally occurring InDels in human populations.** (A) Size distributions of human InDels within  
171 different regions. (B) Log<sub>2</sub> odds ratios for different categories of InDels. Each dot represents a TF pair with  
172 corresponding spacing relationship. Mann-Whitney U test was used to compare the odds ratios between different  
173 spacing relationships.

174

175 **Spacing alterations across mouse strains are generally tolerated by relaxed transcription**  
176 **factor binding and promoter and enhancer function**

177 To investigate the regulatory effects of naturally occurring InDels that alter motif spacing, we  
178 leveraged more than 50 million SNPs and 5 million InDels from five genetically diverse mouse  
179 strains and the ChIP-seq data of key TFs and histone acetylation for the bone marrow-derived  
180 macrophages (BMDMs) from every mouse strain (Link, Duttke, et al., 2018). The five mouse  
181 strains include C57BL/6J (C57), BALB/cJ (BALB), NOD/ShiLtJ (NOD), PWK/PhJ (PWK), and  
182 SPRET/EiJ (SPRET). We first characterized the spacing relationship between the macrophage  
183 lineage-determining TFs (LDTFs) PU.1 and C/EBP $\beta$ , which have been found to bind in a  
184 collaborative manner at regulatory regions of macrophage-specific genes (Heinz et al., 2010).  
185 Based on our computational framework for characterizing spacing relationships (Fig. 1A), these  
186 two TFs follow a relaxed spacing relationship independent of their motif orientations (Fig. 3A;  
187 KS p-value < 1e-6). Moreover, both PU.1 and C/EBP $\beta$  binding activities quantified by the ChIP-

188 seq tags were not correlated with motif spacing, suggesting no direct association between  
 189 spacing and TF binding (Fig. 3B).

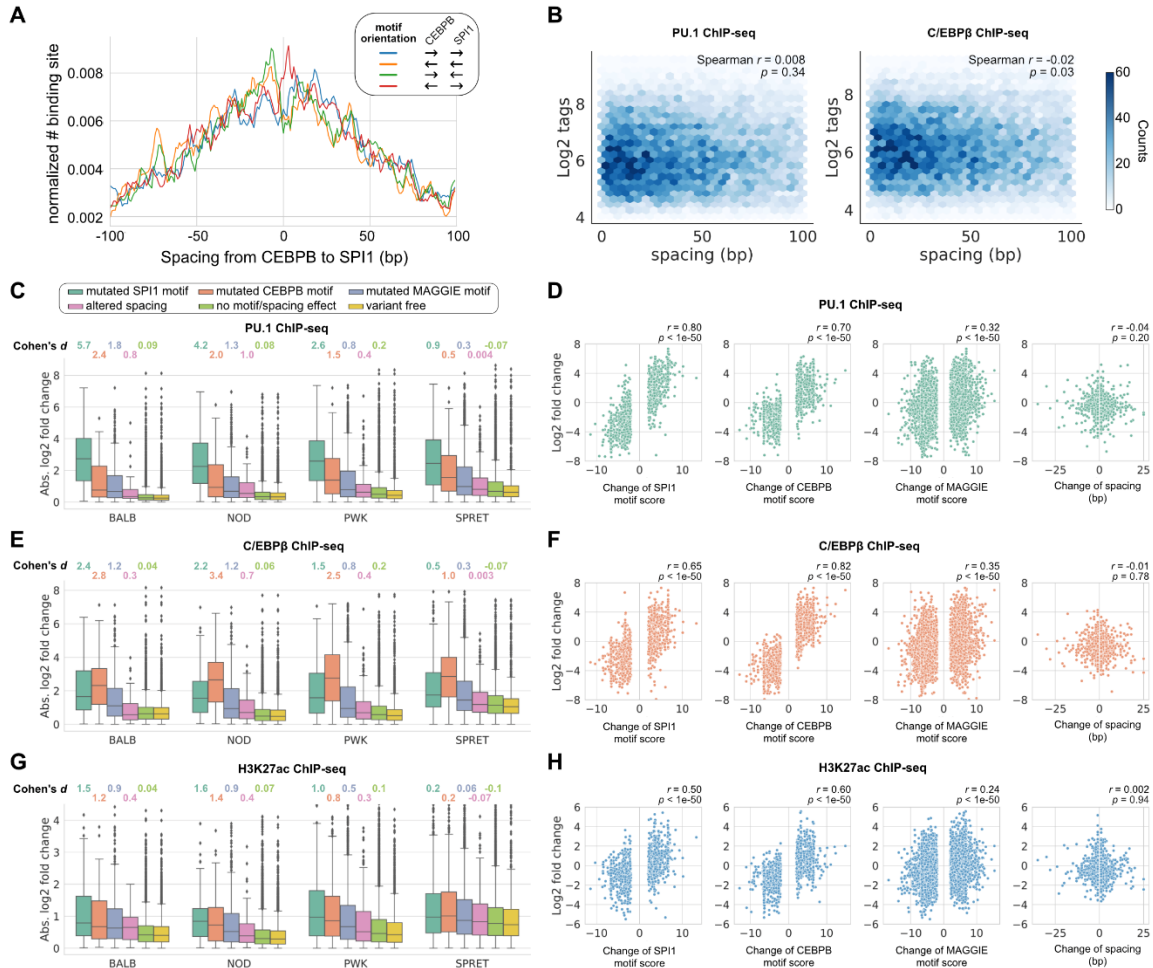

190

191 **Figure 3. Effects of spacing alterations resulting from natural genetic variation across mouse strains.** (A)  
 192 Spacing distributions of PU.1 and C/EBP $\beta$  motif at co-binding sites. (B) Density plots showing the relationship  
 193 between TF binding activity and motif spacing for the co-binding sites. Log<sub>2</sub> ChIP-seq tags were calculated within  
 194 300 bp to quantify the binding activity of PU.1 and C/EBP $\beta$ . The color gradients represent the number of sites.  
 195 Spearman correlation coefficients together with p-values are displayed. (C, E, G) Absolute log<sub>2</sub> fold changes of  
 196 ChIP-seq tags between C57 and another strain for (C) PU.1 binding, (E) C/EBP $\beta$  binding, or (G) H3K27ac level.  
 197 Boxplots show the median and quartiles of every distribution. Cohen's d effect sizes comparing against variant-free  
 198 regions are displayed on top. (D, F, H) Correlations between change of motif spacing or motif score and change of  
 199 (D) PU.1 binding, (F) C/EBP $\beta$  binding, or (H) H3K27ac level. Spearman correlation coefficients together with p-  
 200 values are displayed.

201  
202 We then conducted independent comparisons between C57 and one of the other four strains to  
203 investigate the effects of spacing alterations caused by natural genetic variation, which are  
204 mostly less than 5 bp like natural InDels in human populations (Figure 3-figure supplement 1).  
205 We first identified the co-binding sites of PU.1 and C/EBP $\beta$  for each strain and then, for each  
206 pairwise analysis, pooled the co-binding sites of C57 and the compared strain to obtain the  
207 testing set of regions. Based on the impacts of genetic variants on motif affinity and motif  
208 spacing, we categorized the testing regions into the following non-overlapping groups: 1)  
209 mutated PU.1 (i.e., SPI1) motif, 2) mutated C/EBP $\beta$  (i.e., CEBPB) motif, 3) mutated other  
210 functional motifs (i.e., MAGGIE motif), 4) altered spacing, 5) no motif affinity/spacing effect,  
211 and 6) variant free. Functional motifs were identified from PU.1 and C/EBP $\beta$  binding sites  
212 separately using MAGGIE (Shen et al., 2020), which is a computational tool that can identify  
213 motifs whose affinity changes are associated with TF binding changes (Figure 3-figure  
214 supplement 2). The effect of genetic variation was quantified by the log<sub>2</sub> fold difference of  
215 ChIP-seq tag counts between strains at orthogonal sites (Fig. 3C). All the four independent  
216 comparisons showed that PU.1 binding is most strongly affected by PU.1 motif mutation,  
217 followed by C/EBP $\beta$  motif mutation and other functional motif mutation. Spacing alterations  
218 have a smaller effect size than any of these motif mutations, but still a relatively larger effect  
219 than variants affecting neither motif affinity nor spacing. Despite the moderate effect size of  
220 spacing alterations, we found such effect was independent of the size or direction of InDels (Fig.  
221 3D). On the contrary, changes of PU.1 ChIP-seq tags are strongly correlated with changes of  
222 motif affinity (Fig. 3D). In addition, the effects of motif mutation and spacing alteration are not  
223 varied by the initial spacing between PU.1 and C/EBP $\beta$  motifs (Figure 3-figure supplement 3).

224 Similar findings were observed in C/EBP $\beta$  binding, except that expectedly C/EBP $\beta$  motif  
225 mutation had the largest effect size and the strongest correlation with C/EBP $\beta$  binding activity  
226 (Fig. 3E, F; Figure 3-figure supplement 3).

227

228 To investigate whether the effects of altered spacing on PU.1 and C/EBP $\beta$  binding can be  
229 generalized to hierarchical interactions with signal-dependent transcription factors (SDTFs), we  
230 leveraged the ChIP-seq data of PU.1, the NF $\kappa$ B subunit p65, and an AP-1 factor cJun for  
231 BMDMs treated with the TLR4-specific ligand Kdo2 lipid A (KLA) in the same five strains of  
232 mice (Link, Duttke, et al., 2018). Upon macrophage activation with KLA, p65 enters the nucleus  
233 and primarily binds to poised enhancer elements that are selected by LDTFs including PU.1 and  
234 AP-1 factors (Heinz et al., 2015). We observed a relaxed spacing relationship between PU.1 and  
235 p65 and between cJun and p65 (Figure 3-figure supplement 4). In addition, InDels altering motif  
236 spacing had a much smaller effect size on TF binding than motif mutations (Figure 3-figure  
237 supplement 5), consistent with our findings from PU.1 and C/EBP $\beta$ .

238

239 Although alterations in motif spacing had generally weak effects at the level of DNA binding, it  
240 remained possible that changes in motif spacing could influence subsequent steps in enhancer  
241 and promoter activation. To examine this, we extended our analysis to local acetylation of  
242 histone H3 lysine 27 (H3K27ac), which is a histone modification that is highly correlated with  
243 enhancer and promoter function (Creyghton et al., 2010). We leveraged the H3K27ac ChIP-seq  
244 data of untreated BMDMs in the five strains of mice (Link, Duttke, et al., 2018) and calculated  
245 the log fold changes of H3K27ac level within the extended 1,000-bp regions of the PU.1 and  
246 C/EBP $\beta$  co-binding sites. Like for TF binding, altered spacing demonstrated weaker effects on

247 histone acetylation than motif mutations (Fig. 3G; Figure 3-figure supplement 3), which is  
248 supported by the high consistency between change of TF binding and change of histone  
249 acetylation (Figure 3-figure supplement 6). The relative tolerance of spacing alteration was  
250 further reflected by a weak correlation between the change of acetylation level and the size of  
251 InDels, in comparison to a much stronger correlation with changes in motif affinity (Fig. 3H).

252

253 **Human quantitative trait loci altering spacing between relaxed transcription factors have**  
254 **small effect sizes**

255 To study the effects of spacing alteration on transcription factor binding and local histone  
256 acetylation in human cells, we leveraged the ChIP-seq data of ERG, p65, and H3K27ac in  
257 endothelial cells from dozens of individuals (Stolze et al., 2020). ERG is an ETS factor that  
258 functions as an LDTF in endothelial cells that selects poised enhancers where p65 binds in a  
259 hierarchical manner upon interleukin-1 $\beta$  (IL-1 $\beta$ ) stimulation (Hogan et al., 2017). ERG and p65  
260 follow a relaxed spacing relationship according to our method (Fig. 4A). Next, we obtained 557  
261 TF binding quantitative trait loci (bQTLs) for ERG, 5,791 bQTLs for p65, 25,621 histone  
262 modification QTLs (hQTLs) for H3K27ac in untreated cells, and 21,635 hQTLs for H3K27ac in  
263 IL-1 $\beta$ -treated cells (Stolze et al., 2020). We further classified bQTLs and hQTLs based on their  
264 impacts on motif affinity and spacing: 1) mutated both ERG and p65 (i.e., RELA) motif, 2)  
265 mutated ERG motif only, 3) mutated p65 motif only, 4) mutated other functional motifs  
266 identified by MAGGIE (Shen et al., 2020), 5) altered spacing between ERG and p65 motif, 6)  
267 none of the above. To find functional motifs, we fed MAGGIE with 100-bp sequences around  
268 QTLs before and after swapping alleles at the center (Figure 4-figure supplement 1). As a result,  
269 only a small portion of bQTLs and hQTLs directly mutates an ERG or RELA motif (Fig. 4B;

270 Figure 4-figure supplement 2). However, such motif mutations are enriched in bQTLs compared  
271 to non-QTLs (Fisher's exact  $p < 1e-4$ ). On the contrary, InDels that alter motif spacing are  
272 significantly depleted in p65 bQTLs (Fisher's exact  $p = 1.3e-15$ ). These InDels from the dozens  
273 of individuals are predominantly shorter than 5 bp by following a similar size distribution of  
274 those in human populations (Figure 4-figure supplement 3). A large proportion of QTLs affect  
275 other functional motifs, implicating the complexity of TF interactions. More than a quarter of the  
276 QTLs affect neither motif affinity nor motif spacing, which can be explained by the high  
277 correlation of non-functional variants with functional variants due to linkage disequilibrium.  
278  
279 We further compared the effect sizes of different categories of QTLs. Despite being the minority  
280 among QTLs, variants that mutate both ERG and RELA motifs have the strongest effects on both  
281 p65 binding and histone acetylation in IL-1 $\beta$ -treated endothelial cells (Fig. 4C). In comparison,  
282 ERG binding and the basal level of histone acetylation are significantly affected by ERG motif  
283 mutations in untreated endothelial cells and not by p65 motif mutations, consistent with the  
284 hierarchical interaction of p65 only upon IL-1 $\beta$  stimulation (Figure 4-figure supplement 4). In  
285 both conditions of endothelial cells, spacing alterations have the smaller effect size than motif  
286 mutation categories and are not significantly different from likely non-functional variants in the  
287 "other" group. The examples showed a variant being both a p65 bQTL and a H3K27ac hQTL  
288 under the IL-1 $\beta$  state due to its impact on an ERG motif, and a 4-bp insertion between ERG and  
289 p65 motifs associated with no change in p65 binding or H3K27ac (Fig. 4D).

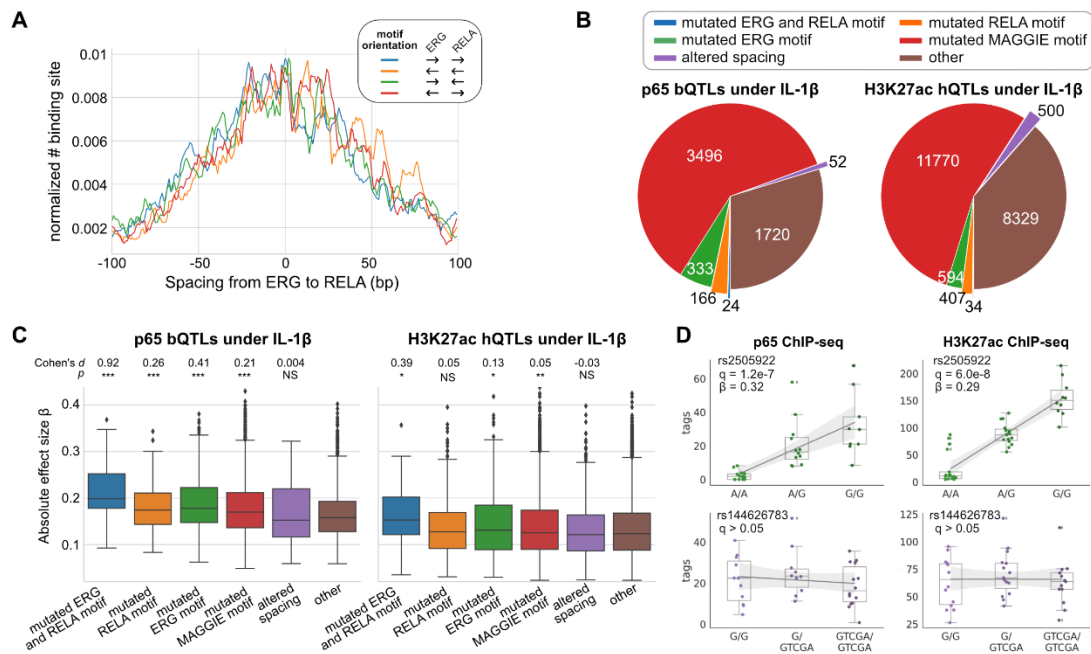

290

291 **Figure 4. Effects of chromatin QTLs in human endothelial cells.** (A) Spacing distributions of ERG and RELA  
 292 motif at co-binding sites. (B) Classification of chromatin QTLs based on the impacts on motif and spacing. (C)  
 293 Absolute correlation coefficients of different QTLs. Cohen's d and Mann-Whitney U test p-values comparing  
 294 against the “other” group are displayed on top. \* $p < 0.01$ , \*\* $p < 0.001$ , \*\*\* $p < 0.0001$ . (D) Example QTLs for large  
 295 effect size due to ERG motif mutation (upper) and trivial effect due to spacing alteration (lower).

296

### 297 Relaxed transcription factor binding is highly tolerant to synthetic spacing alterations

298 The generally small effects of InDels occurring between TF pairs exhibiting relaxed spacing  
 299 relationships raised the question of the robustness and the extent of such tolerance at genomic  
 300 locations lacking such variation. We addressed this question by using CRISPR/Cas9 editing to  
 301 introduce synthetic InDels between binding sites observed for the LDTFs PU.1 and C/EBP $\beta$  in  
 302 mouse macrophages (Fig. 5A). We used lentiviral transduction in Cas9-expressing ER-HoxB8  
 303 cells, which are conditionally immortalized monocyte progenitors, to introduce gRNAs targeting  
 304 genomic sequences between the locations of PU.1 and C/EBP $\beta$  co-binding. The Cas9 nuclease  
 305 activity at these sites resulted in non-homologous DNA repair that generated various sizes of



306 InDels in the populations of transduced cells. After sorting the successfully transduced ER-  
 307 HoxB8 cells and differentiating them into macrophages, we performed ChIP for C/EBP $\beta$  and  
 308 deeply sequenced amplicons of the target regions of Cas9 cleavage. Lastly, the reads were  
 309 mapped to the target regions by allowing various sizes of gaps at the cut sites and were  
 310 quantified by comparing to the input DNA samples.

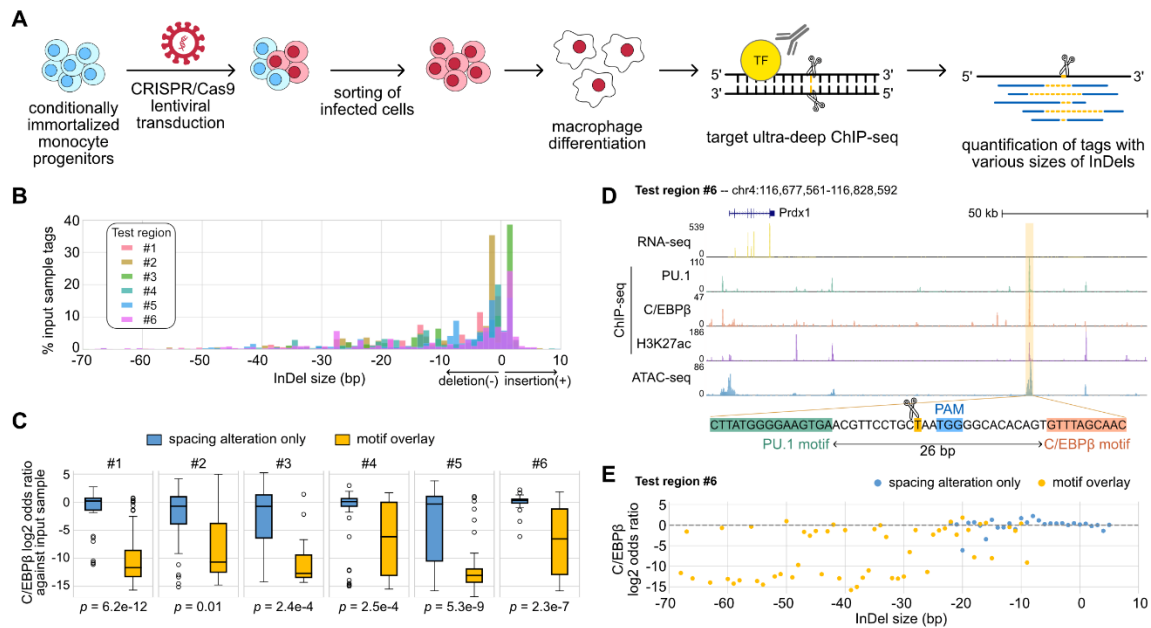

311 **Figure 5. Effects of variable sizes of synthetic spacing alterations.** (A) Schematic for generating and analyzing  
 312 synthetic spacing alterations. (B) The distributions of valid read counts from the input sample based on the InDel  
 313 sizes of the reads. Negative InDel size indicates deletion, and positive size means insertion. (C) Log<sub>2</sub> odds ratios by  
 314 comparing C/EBP $\beta$  ChIP-seq reads and input sample ChIP-seq reads. Y=0 indicates where TF binding has an  
 315 expected amount of activity. P-values were based on two-sample t-tests by comparing the InDel groups of each test  
 316 region. (D) Sequencing data of ER-HoxB8 cells at co-binding site of PU.1 and C/EBP $\beta$ . Highlighted is test region  
 317 #6 whose DNA sequence from PU.1 motif to C/EBP $\beta$  motif is shown. (E) Log<sub>2</sub> odds ratios of test regions #6 as a  
 318 function of InDel size.

320  
 321 We tested six PU.1 and C/EBP $\beta$  co-binding sites with the original motif spacing ranging from 26  
 322 to 55 bp (Figure 5-table supplement 1) and quantified the effects of various InDels on C/EBP $\beta$



323 binding. Among the six test regions, three of them have supportive evidence from naturally  
324 occurring InDels of mouse strains (region #1, #3, #5) and the other three don't (region #2, #4,  
325 #6). Based on the bioinformatic analysis of the ultra-deep sequencing reads from the input DNA  
326 samples, we saw that the CRISPR/Cas9 system generated a wide range of InDels with most  
327 deletions being < 30 bp and short insertions usually less than 5 bp (Fig. 5B). It provides longer  
328 deletions than natural genetic variations found across mouse strains (Figure 3-figure supplement  
329 1) and in human populations (Figure 2A). After classifying ChIP-seq reads based on the InDel  
330 size and whether the InDel overlaps with any of the PU.1 and C/EBP motifs, we estimated the  
331 effect size of InDels on C/EBP $\beta$  binding by calculating the odds ratio between C/EBP $\beta$  ChIP-seq  
332 reads and input sample ChIP-seq reads for every InDel group. We found that InDels altering  
333 spacing have significantly weaker effects on C/EBP $\beta$  binding in comparison to those overlapping  
334 with at least one of the motifs (Fig. 5C). For some test regions, the effects of pure spacing  
335 alterations are almost negligible, exemplified by test region #6 (Fig. 5D, E) and test region #1  
336 (Figure 5-figure supplement 1). Test region #6 is located near a highly expressed gene *Prdx1* and  
337 has strong binding of PU.1 and C/EBP $\beta$  binding and strong signals of H3K27ac and chromatin  
338 accessibility indicated by ATAC-seq in ER-Hoxb8 cells, which all support its potential  
339 regulatory function (Fig. 5D). The PU.1 and C/EBP $\beta$  motifs at this region are 26 bp apart. In  
340 general, spacing alterations ranging from 5-bp increase to 22-bp decrease did not have a strong  
341 effect on TF binding, indicated by a log<sub>2</sub> odds ratio close to 0 (Fig. 5E). A small number of  
342 outliers were observed at each region where specific InDels resulted in substantial loss of  
343 binding (e.g., -20 bp, Fig. 5E). C/EBP $\beta$  binding at these specific InDels was generally  
344 discontinuous with 1-bp increments (e.g., -19 bp and -21 bp, Fig. 5E). The basis for these highly  
345 localized changes in the odds ratio in a small fraction of InDels that alter spacing is unclear. On

346 the contrary, deletions overlapping with motifs resulted in a general decrease in TF binding  
347 activity. Similar results were found at test region #1 where PU.1 and C/EBP $\beta$  motifs are 41 bp  
348 apart (Figure 5-figure supplement 1A). This *Ly9* enhancer also has a 5-bp insertion between  
349 PU.1 and C/EBP $\beta$  motifs in BALB, NOD, and PWK mice, and shows unaffected binding of  
350 PU.1 and C/EBP $\beta$  in the BMDMs of these strains (Figure 5-figure supplement 1B). As a result of  
351 the synthetic InDels, the C/EBP $\beta$  binding activity was generally unaffected by spacing  
352 alterations only whereas deletions affecting motifs substantially diminished TF binding (Figure  
353 5-figure supplement 1C).

354

355

## 356 **Discussion**

357 By classifying the genome-wide spacing relationships of 75 co-binding TFs as “constrained” or  
358 “relaxed”, we revealed that relaxed spacing relationships were the dominant pattern of  
359 interaction for majority of these factors. Among these factors, approximately half could also  
360 participate in constrained spacing relationships with specific TF partners. We confirmed TF pairs  
361 known to exhibit constrained relationships (e.g., GATA1-TAL1) and identified previously  
362 unreported constrained relationships for additional pairs, including EGR1 and JUND. Overall,  
363 this finding of a subset of constrained TF interactions on a genome wide level is consistent with  
364 the locus-specific examples provided by functional and structural studies of the interferon- $\beta$   
365 enhanceosome (Panne, 2008) and in vivo studies of synthetically modified enhancer elements in  
366 Ciona (Farley et al., 2015). Each of these examples represents genomic regulatory elements in  
367 which key TF motifs are tightly spaced in their native contexts (i.e., 0-9 bp between motifs).  
368 Direct protein-protein interactions are observed between bound TFs at the interferon- $\beta$

369 enhanceosome, analogous to interactions defined for cooperative TFs that form ternary  
370 complexes (Morgunova & Taipale, 2017; Reményi et al., 2003). In the present studies, InDels  
371 between TF pairs exhibiting constrained spacings were under large selective constraints that  
372 were comparable to InDels at motifs, suggesting a deleterious effect of these spacing alterations  
373 on TF binding. However, the spacing analyses in this study did not directly consider the possible  
374 overlap or lack of spacing between TF binding sequences. Thus, we are not able to clearly  
375 distinguish effects of spacing alterations from effects of InDels on motifs at sites of tightly  
376 spaced composite motifs.

377  
378 The observation that most TF pairs exhibited relaxed spacing relationships has intriguing  
379 implications for the mechanisms by which functional enhancers and promoters are selected from  
380 chromatinized DNA. In contrast to ternary complexes of TFs that cooperatively bind to  
381 composite elements as a unit, relaxed spacing relationships appear to not require specific protein-  
382 protein interactions between TFs for collaborative binding at most genomic locations. Although  
383 pioneering TFs necessary for selection of cell-specific enhancers have been reported to recognize  
384 their motifs within the context of nucleosomal DNA (Zaret & Carroll, 2011), the basis for  
385 collaborative binding interactions between TFs with relaxed spacings remains poorly understood.

386  
387 While the current studies relying on natural genetic variation and mutagenesis experiments  
388 concluded clear tolerance of spacing alterations between motifs of TFs with relaxed spacings, the  
389 extent to which this set of binding sites is representative of all regulatory elements is unclear. For  
390 example, we observed outliers in which significant differences in TF binding between mouse  
391 strains were associated with InDels occurring between motifs. However, the proportion of

392 outliers was generally similar to that observed at genomic regions lacking such InDels, and such  
393 strain differences may be driven by distal effects of genetic variation on interacting enhancer or  
394 promoter regions (Hoeksema et al., 2021; Link, Duttke, et al., 2018). The remarkable tolerance  
395 of synthetic InDels at two independent endogenous genomic locations between PU.1 and  
396 C/EBP $\beta$  binding sites strongly support the generality of relaxed binding interactions for these  
397 two proteins. Intriguingly, while the densities of C/EBP motifs increase with decreasing distance  
398 to PU.1 motifs over a 100 bp range (Fig. 3A), deletions from 1 to >30 bp between PU.1-C/EBP $\beta$   
399 pairs did not result in improved binding. Instead, relatively constant binding was observed with  
400 progressive deletions bringing two motifs close together until the deletions started to cause  
401 mutations in one or both motifs. This is consistent with the lack of correlation between DNA  
402 binding strengths and distances between these factors (Figure 3B). A limitation of these studies  
403 is that few and relatively short insertions were obtained, preventing conclusions as to the extent  
404 to which increases in spacing are tolerated.

405

406 In concert, the present studies provide a basis for estimation of the potential phenotypic  
407 consequences of naturally occurring InDels in non-coding regions of the genome. The majority  
408 of naturally occurring InDels are less than 5 bp in length. In nearly all cases, InDels of this size  
409 range between motifs for TFs that have relaxed binding relationships are unlikely to alter TF  
410 binding and function, and InDels of much greater length are frequently tolerated. In contrast,  
411 InDels between motifs for TFs that have constrained binding relationships have the potential to  
412 result in biological consequences. Application of these findings to the interpretation of non-  
413 coding InDels that are associated with disease risk will require knowledge of the relevant cell

414 type in which the InDel exerts its phenotypic effect and the types of TF interactions driving the  
415 selection and function of the affected regulatory elements.

416

## 417 **Methods**

### 418 **Sequencing data processing**

419 We downloaded two replicates for each TF ChIP-seq data from ENCODE data portal (Davis et  
420 al., 2018). The mouse BMDM data and the human endothelial cell data were downloaded from  
421 the GEO database with accession number GSE109965 (Link, Duttke, et al., 2018) and  
422 GSE139377 (Stolze et al., 2020), respectively. We mapped ChIP-seq and ATAC-seq reads using  
423 Bowtie2 v2.3.5.1 with default parameters (Langmead & Salzberg, 2012) and mapped RNA-seq  
424 reads using STAR v2.5.3 (Dobin et al., 2013). All the human data downloaded from ENCODE  
425 were mapped to the hg38 genome. Data from C57BL/6J mice were mapped to the mm10  
426 genome. Data from other mouse strains and endothelial cell data from different individuals were  
427 mapped to their respective genomes built by MMARGE v1.0 (Link, Romanoski, et al., 2018).  
428 More details are described below.

429

430 Based on the mapped ChIP-seq data, we called TF binding sites or peaks using HOMER v4.9.1  
431 (Heinz et al., 2010). For data with replicates including ENCODE data and mouse data, we first  
432 called unfiltered 200-bp peaks using HOMER “findPeaks” function using parameters “-style  
433 factor -L 0 -C 0 -fdr 0.9 -size 200” and then ran IDR v2.0.3 with default parameters (Li et al.,  
434 2011) to obtain reproducible peaks. For data without replicates including human endothelial cell  
435 data and ER-HoxB8 ChIP-seq data, we called peaks using HOMER “findPeaks” with the default  
436 setting and parameters “-style factor -size 200”.

437

438 Activity of TF binding was quantified by the ChIP-seq tag counts within 300-bp around peak  
439 centers and normalized by library size using HOMER “annotatePeaks.pl” script with parameters  
440 “-norm 1e7 -size -150,150”. Activity of promoter and enhancer was quantified by normalized  
441 H3K27ac ChIP-seq tags within 1,000-bp regions around TF peak centers using parameters “-  
442 norm 1e7 -size -500,500”.

443

#### 444 **Motif identification**

445 Based on DNA sequences of the TF binding sites, we calculated motif scores by the dot products  
446 between PWMs and sequence vectors using Biopython package (Cock et al., 2009). The PWMs  
447 were obtained from either the JASPAR database (Fornes et al., 2020) or de novo motif analysis  
448 using HOMER “findMotifsGenome.pl” script (Heinz et al., 2010) if unavailable in the JASPAR  
449 database. The original PWMs were then trimmed to keep only the core motifs starting from the  
450 first position where information content greater than 0.3 to the last position of information  
451 content greater than 0.5 (Ng et al., 2014). The valid motifs were identified by a motif score  
452 passing a false positive rate (FPR) 0.1% and a location within 50 bp close to the peak center. The  
453 motif spacing is computed as the edge-to-edge distance between two core motifs at TF co-  
454 binding sites. If there are multiple valid motifs for one or both TFs, we computed the spacing  
455 between all possible combinations of valid motifs.

456

#### 457 **Characterization of spacing relationships**

458 To test for the constrained spacing relationship between any two TFs, we developed a method to  
459 identify “spikes” in the spacing distribution. We first counted the TF pair distances at single-

460 base-pair resolution ranging from -100 bp to +100 bp. Next, we computed the slope at each  
461 position using the following formula:

$$462 \quad S_i = \frac{\Delta_{i,i-1} + \Delta_{i,i+1}}{2}, i \in [-99,99]$$

$$463 \quad \Delta_{i,i-1} = N_i - N_{i-1}$$

464  $S_i$  is the average of single-step forward and backward slope at position  $i$ .  $N_i$  represents the  
465 number of TF pair at position  $i$ , and  $\Delta$  is the difference in the number of TF pairs between two  
466 locations. We conducted permutation tests to compare each  $S_i$  to a simulated null distribution to  
467 determine a p-value based on the percentile rank. P-value smaller than  $6.25e-05$  (familywise  
468 error rate= $0.05/200/4$ ) is called significant, indicating a spike is found among motif spacing  
469 between the testing TF pair. The null distribution was generated by 1,000 iterations of 1,000  
470 random spacing between 0 and 100 bp.

471  
472 To test for the relaxed spacing relationship, we used Kolmogorov–Smirnov (KS) test to compare  
473 a spacing distribution to the random distribution. We randomly sampled integers between -100  
474 and 100 to match the same size of the testing spacing distribution and then tested the spacing  
475 distribution against the distribution of the random integers to obtain a p-value. We repeated the  
476 above process 100 times and reported the average p-value.

477

#### 478 **Categorization of gnomAD variants based on allele frequency**

479 We obtained InDels from gnomAD v3.1 (Karczewski et al., 2020). These gnomAD variants were  
480 overlapped with TF co-binding sites, specifically with two TF motifs and their intermediate  
481 sequences. For TF pairs with constrained spacing relationships, we only kept the co-bindings that  
482 have the significant constrained spacing  $\pm 2$  bp. To account for region-by-region variation in

483 selective pressure, we also overlapped variants with 100-bp upstream and 100-bp downstream  
484 background regions outside of TF co-binding sites. For each co-binding site, we categorized  
485 InDels into high-frequency variants ( $AF > 0.01\%$ ), rare variants ( $AF < 0.01\%$ ,  $AC > 1$ ), and  
486 singletons ( $AC = 1$ ) and computed the odds ratios of different categories of InDels between motif  
487 or intermediate regions and background regions.

488

### 489 **Genetic variation processing and genome building**

490 Genetic variation of the five mouse strains was obtained from (Keane et al., 2011), and that of  
491 the human individuals from which endothelial cell data were generated was derived from (Stolze  
492 et al., 2020). We used MMARGE v1.0 with default variant filters (Link, Romanoski, et al., 2018)  
493 to build separate genomes for each mouse strain and human individual. The sequencing data  
494 from different samples were respectively mapped to the corresponding genomes and were then  
495 shifted to a common reference genome using MMARGE “shift” function to facilitate comparison  
496 at homologous regions. The reference genome is mm10 for mouse strains and hg19 for human  
497 individuals.

498

### 499 **Motif mutation analysis**

500 We used MAGGIE (Shen et al., 2020) to identify functional motifs for different TF binding. To  
501 prepare the inputs into MAGGIE based on the mouse strains data, we adapted a similar strategy  
502 as described in (Shen et al., 2020). In brief, we conducted pairwise orthogonal comparisons of  
503 TF peaks between each possible pair of the five strains to find strain-differential peaks. We then  
504 extracted pairs of 200-bp sequences around the centers of the differential peaks from the  
505 genomes of two comparative strains, the ones with TF binding as positive sequences paired with



506 those without TF binding as negative sequences. For the QTLs of human endothelial cells,  
507 MAGGIE can directly work with a VCF file of QTLs with effect size and effect direction  
508 indicated in a column of the file. We ran MAGGIE separately for each type of QTLs and  
509 reported the significant motifs together with their p-values, which passed false discovery rate  
510 (FDR) < 0.05 after the Benjamini–Hochberg controlling procedure.

511

### 512 **Categorization of genetic variation based on impacts on motif or spacing**

513 We categorized genetic variation based on its impact on motif affinity and motif spacing. Motif  
514 mutations were defined by at least 2-bit difference in the motif score, which is equivalent to  
515 approximately 4-fold difference in the binding likelihood. Mutations of other functional motifs  
516 identified by MAGGIE required that at least one of the functional motifs had motif mutations.  
517 InDels were first classified into motif mutation categories if eligible before being considered in  
518 motif spacing. Therefore, spacing alterations were InDels between target motifs without any  
519 motif mutations. Variants fitting neither motif mutation nor spacing alteration were gathered in a  
520 separate group as a control. Another control category during analysis of mouse strains data was  
521 defined by TF binding sites that have no genetic variation between strains.

522

### 523 **Statistical testing of effect size**

524 We conducted Mann-Whitney U tests between the control category and one of the testing  
525 categories to test for significance. We also obtained the Cohen's *d* (Sullivan & Feinn, 2012)  
526 between the control category and the testing categories and Spearman's correlation coefficients  
527 as measures of effect size.

528

529 **ER-HoxB8 cell-derived macrophage culture and CRISPR knockout**

530 Bone marrow cells were isolated from femurs and tibias of a Cas9-expressing transgenic mouse  
531 (Jackson Laboratory, No.028555). Murine stem cell virus-based expression vector for ER-  
532 HoxB8 was gifted from Dr. David Sykes (Massachusetts General Hospital, Boston, MA). Cas9-  
533 expressing ER-HoxB8 conditionally immortalized myoid progenitor cells were generated  
534 following established protocols (Wang et al., 2006). In brief, bone marrow cells were purified  
535 with a Ficoll gradient (Ficoll-Paque-Plus, Sigma-Aldrich) and resuspended in RPMI 1640  
536 containing 10% FBS, 1% penicillin/streptomycin and 10 ng/ml each of SCF, IL-3 and IL-6  
537 (PeproTech). After 48 hours culture,  $2.5 \times 10^5$  cells in 1 ml were transduced with 2 ml of ER-  
538 HoxB8 retrovirus (in DMEM with 30% FBS) containing 0.5  $\mu$ l/ml lentiblast A (OZ  
539 Biosciences), 2.5  $\mu$ l/ml lentiblast B (OZ Biosciences) and 8  $\mu$ g/ml polybrene (Sigma-Aldrich) in  
540 a well of fibronectin (Sigma-Aldrich)-coated 6-well culture plates and centrifuged at 1000g for  
541 90 min at 22°C. After transduction, 6 ml of ER-HoxB8 cell culture media (RPMI 1640  
542 supplemented with 10% FBS, 1% penicillin/streptomycin, 0.5  $\mu$ M  $\beta$ -estradiol (Sigma-Aldrich),  
543 and 20 ng/ml GM-CSF (PeproTech)) were added and an additional half-media exchange with  
544 ER-Hoxb8 media performed the next day. Transduced cells were selected with G418 (Thermo  
545 Fisher) at 1 mg/ml for 48 hours. Thereafter, cells were maintained in ER-HoxB8 cell culture  
546 media. For baseline ATAC-seq and ChIP-seq of ER-HoxB8 cells prior to gRNA transduction,  
547 cells were washed twice with PBS, plated at a density of  $3 \times 10^6$  cells per 10 cm culture plate, and  
548 differentiated into macrophages in DMEM with 10% FBS, 1% penicillin/streptomycin, and 17  
549 ng/ml M-CSF (Shenandoah) for 7 days with 2 culture media exchanges. Differentiated cells were  
550 washed twice with PBS and collected for sequencing experiments.

551

552 Guide RNA lentiviruses were prepared as previously described (Fonseca et al., 2019) with  
553 modifications as follows. LentiGuide-mCherry was generated by modifying lentiGuide-puro  
554 (Addgene) to remove a puromycin-resistant gene and replace it with mCherry. gRNA sequences  
555 directed between the PU.1 and C/EBP motifs (and one each directed towards the motif itself)  
556 were designed with CHOPCHOP web tool for genome engineering (Labun et al., 2019). One  
557 CRISPR gRNA oligonucleotide was inserted for each target via PCR into a BsmBI cleavage site.  
558 A list of gRNA targets used in this article is shown in Figure 5-table supplement 1. Lenti-X 293T  
559 cells (Clontech) were seeded in poly-D-lysine (Sigma-Aldrich) coated 10 cm tissue culture plates  
560 at a density of 3.5 million cells per plate in 10 ml of DMEM containing 10% FBS and 1%  
561 penicillin/streptomycin, and then incubated overnight at 37°C. After replacement of the media to  
562 6 ml of DMEM containing 30% FBS, plasmid DNAs (5 µg of lentiviral vector, 3.75 µg of  
563 psPAX2 and 1.25 µg of pVSVG) were transfected into LentiX-293T cells using 20 µl of X-  
564 tremeGENE™ HP DNA Transfection Reagent (Roche) at 37°C overnight. The media was  
565 replaced with DMEM containing 30% FBS and 1% penicillin/streptomycin, and then cultured at  
566 37°C overnight. The supernatant was filtrated with 0.45 µm syringe filters and used as lentivirus  
567 media. Cell culture media was replaced, and virus was collected again after 24 hours.  $1 \times 10^6$   
568 Cas9-expressing ER-HoxB8 cells were transduced with virus in 2 ml of lentivirus media and 1  
569 ml of ER-HoxB8 cell media containing 0.5 µl/ml lentiblast A, 2.5 µl/ml lentiblast B, and 8 µg/ml  
570 polybrene in a well of fibronectin-coated 6-well culture plates and centrifuged at 1000 g for 90  
571 min at 22°C. After the transduction, 6 ml of ER-HoxB8 cell media was added to each well. Half  
572 of the media was exchanged the next day and in the following days, cells were expanded and  
573 passaged into T75 flasks. After 5 days, 250,000 successfully transduced cells (indicated by  
574 mCherry fluorescence) for each gRNA were sorted by FACS using a Sony MA900. After FACS,

575 cells were expanded in ER-HoxB8 culture media. Differentiation into macrophages was carried  
576 out as above in DMEM supplemented with M-CSF.

577

### 578 **RNA-seq library preparation**

579 Total RNA was isolated from cells and purified using Direct-zol RNA Microprep columns  
580 according to the manufacturer's instructions (Zymo Research). 500 ng of total RNA were used to  
581 prepare sequencing libraries from polyA enriched mRNA as previously described (Link, Duttke,  
582 et al., 2018). Libraries were PCR-amplified for 14 cycles, size selected using Sera-Mag  
583 Speedbeads (Thermo Fisher Scientific), quantified by Qubit dsDNA HS Assay Kit (Thermo  
584 Fisher Scientific) and 75-bp single-end sequenced on a HiSeq 4000 (Illumina).

585

### 586 **ATAC-seq library preparation**

587 ATAC-seq libraries were prepared as previously described (Hoeksema et al., 2021). In brief,  
588  $5 \times 10^5$  cells were lysed at room temperature in 50  $\mu$ l ATAC lysis buffer (10 mM Tris-HCl, pH  
589 7.4, 10 mM NaCl, 3 mM MgCl<sub>2</sub>, 0.1% IGEPAL CA-630) and 2.5  $\mu$ L DNA Tagmentation  
590 Enzyme mix (Nextera DNA Library Preparation Kit, Illumina) was added. The mixture was  
591 incubated at 37°C for 30 minutes and subsequently purified using the ChIP DNA purification kit  
592 (Zymo Research) as described by the manufacturer. DNA was amplified using the Nextera  
593 Primer Ad1 and a unique Ad2.n barcoding primers using NEBNext High-Fidelity 2X PCR MM  
594 for 8-14 cycles. PCR reactions were size selected using TBE gels for 175 – 350 bp and DNA  
595 eluted using gel diffusion buffer (500 mM ammonium acetate, pH 8.0, 0.1% SDS, 1 mM EDTA,  
596 10 mM magnesium acetate) and purified using ChIP DNA Clean & Concentrator (Zymo

597 Research). Samples were quantified by Qubit dsDNA HS Assay Kit (Thermo Fisher Scientific)  
598 and 75-bp single-end sequenced on HiSeq 4000 (Illumina).

599

### 600 **Crosslinking for ChIP-seq**

601 For PU.1, C/EBP $\beta$ , and H3K27ac ChIP-seq, culture media was removed, and plates were washed  
602 once with PBS and then fixed for 10 minutes with 1% formaldehyde (Thermo Fisher Scientific)  
603 in PBS at room temperature. Reaction was then quenched by adding glycine (Thermo Fisher  
604 Scientific) to 0.125M. After fixation, cells were washed once with cold PBS and then scraped  
605 into supernatant using a rubber policeman, pelleted for 5 minutes at 400xg at 4°C. Cells were  
606 transferred to Eppendorf DNA LoBind tubes and pelleted at 700xg for 5 minutes at 4°C, snap-  
607 frozen in liquid nitrogen and stored at -80°C until ready for ChIP-seq protocol preparation.

608

### 609 **Chromatin immunoprecipitation**

610 Chromatin immunoprecipitation (ChIP) was performed in biological replicates as described  
611 previously (Hoeksema et al., 2021). Samples were sonicated using a probe sonicator in 500  $\mu$ l  
612 lysis buffer (10 mM Tris/HCl pH 7.5, 100 mM NaCl, 1 mM EDTA, 0.5 mM EGTA, 0.1%  
613 deoxycholate, 0.5% sarkozyl, 1x protease inhibitor cocktail). After sonication, 10% Triton X-100  
614 was added to 1% final concentration and lysates were spun at full speed for 10 minutes. 1% was  
615 taken as input DNA, and immunoprecipitation was carried out overnight with 20  $\mu$ l Protein A  
616 Dynabeads (Invitrogen) and 2  $\mu$ g specific antibodies for C/EBP $\beta$  (Santa Cruz, sc-150), PU.1  
617 (Santa Cruz, sc-352X), and H3K27ac (Active Motif, 39135). Beads were washed three times  
618 each with wash buffer I (20 mM Tris/HCl, 150 mM NaCl, 0.1% SDS, 1% Triton X-100, 2 mM  
619 EDTA), wash buffer II (10 mM Tris/HCl, 250 mM LiCl, 1% IGEPAL CA-630, 0.7% Na-

620 deoxycholate, 1 mM EDTA), TE 0.2% Triton X-100 and TE 50 mM NaCl and subsequently  
621 resuspended 25  $\mu$ l 10 mM Tris/HCl pH 8.0 and 0.05% Tween-20. ChIP-seq libraries were  
622 prepared on the Dynabeads as described below. For locus specific enrichment ChIP-seq, bead  
623 complex was resuspended in 50  $\mu$ l 1% SDS-TE. 4  $\mu$ l ProtK, 4  $\mu$ l RNase A, 3  $\mu$ l 5 M NaCl was  
624 added to these and the input samples and incubated at 50°C for 1 hour, reverse crosslinked at  
625 65°C overnight and then eluted from the beads.

626

### 627 **ChIP-seq library preparation**

628 ChIP libraries were prepared while bound to Dynabeads using NEBNext Ultra II Library  
629 preparation kit (NEB) using half reactions. DNA was polished, polyA-tailed and ligated after  
630 which dual UDI (IDT) or single (Bioo Scientific) barcodes were ligated to it. Libraries were  
631 eluted and crosslinks reversed by adding to the 46.5  $\mu$ l NEB reaction 16  $\mu$ l water, 4  $\mu$ l 10% SDS,  
632 4.5  $\mu$ l 5 M NaCl, 3  $\mu$ l 0.5 M EDTA, 4  $\mu$ l 0.2 M EGTA, 1  $\mu$ l RNase (10 mg/ml) and 1  $\mu$ l 20  
633 mg/ml proteinase K, followed by incubation at 55°C for 1 hour and 75°C for 30 minutes in a  
634 thermal cycler. Dynabeads were removed from the library using a magnet and libraries were  
635 cleaned up by adding 2  $\mu$ l SpeedBeads 3 EDAC (Thermo) in 124  $\mu$ l 20% PEG 8000/1.5 M NaCl,  
636 mixing well, then incubating at room temperature for 10 minutes. SpeedBeads were collected on  
637 a magnet and washed two times with 150  $\mu$ l 80% ethanol for 30 seconds. Beads were collected  
638 and ethanol removed following each wash. After the second ethanol wash, beads were air dried  
639 and DNA eluted in 12.25  $\mu$ l 10 mM Tris/HCl pH 8.0 and 0.05% Tween-20. DNA was amplified  
640 by PCR for 14 cycles in a 25  $\mu$ l reaction volume using NEBNext Ultra II PCR master mix and  
641 0.5  $\mu$ M each Solexa 1GA and Solexa 1GB primers. Libraries were size selected using TBE gels  
642 for 200 – 500 bp and DNA eluted using gel diffusion buffer (500 mM ammonium acetate, pH

643 8.0, 0.1% SDS, 1 mM EDTA, 10 mM magnesium acetate) and purified using ChIP DNA Clean  
644 & Concentrator (Zymo Research). Sample concentrations were quantified by Qubit dsDNA HS  
645 Assay Kit (Thermo Fisher Scientific) and 75-bp single-end sequenced on HiSeq 4000.

646

#### 647 **Biotin-mediated locus specific enrichment ChIP-seq library preparation**

648 After performing the target-specific ChIPs, we performed an initial PCR for locus-specific  
649 amplicon enrichment using NEBNext 2X High Fidelity PCR MM (NEB) and 5'-biotinylated  
650 stub adapter primers specific to appropriate genomic regions to be interrogated (Figure 5-table  
651 supplement 1). Initial hotstart/denaturation at 98°C for 30 sec was followed by 10 cycles of  
652 amplification (98°C for 15 sec, 65-67°C for 15 sec, 72°C for 30 sec) and then a final elongation  
653 at 72°C for 5 min. After this, we performed a 0.7X AmpureXP clean-up and eluted in 20 µl 0.5x  
654 TT (5 mM Tris pH 8.0 + 0.025% Tween20). Dynabeads MyOne Streptavidin T1 beads were then  
655 washed in 1x Wash Binding Buffer (WBB, 2X WBB: 10 mM Tris-HCl (pH 7.5), 1 mM EDTA,  
656 2 M NaCl, 0.1% Tween) and resuspended beads at 20 µl per sample in 2x WBB. 20 µl prepared  
657 Dynabeads MyOne Streptavidin T1 beads (in 2x WBB) were then added to cleaned up 20 µl 0.5x  
658 TT PCR fragments, mixed and incubated for 60min at RT with mild shaking. After this, beads  
659 were collected on a magnet and washed twice with 150 µl 1x WBB and once with 180 µl TET  
660 (TE + 0.05% Tween-20). Finally, beads were resuspended in 25 µl 0.5x TT and on bead PCR for  
661 addition of Illumina-specific adapters and 10-bp Unique Dual Indexes (UDIs) using NEBNext  
662 2X High Fidelity PCR MM (NEB) and 25 PCR cycles was performed (Figure 5-table  
663 supplement 2). Libraries were size selected using TBE gels for 300-500 bp and DNA eluted  
664 using gel diffusion buffer and purified using ChIP DNA Clean & Concentrator (Zymo Research).

665 Samples were quantified by Qubit dsDNA HS Assay Kit (Thermo Fisher Scientific) and 150-bp  
666 paired-end sequenced on NextSeq 500 (Illumina).

667

### 668 **Analysis of variable InDels from CRISPR experiments**

669 We mapped the reads to the target regions using the local alignment mode of Bowtie2 v2.3.5.1  
670 (Langmead & Salzberg, 2012). To allow for InDels with tens of bases, we reduced the gap  
671 extend penalty and increased the gap open penalty so that the gaps could be long but not occur at  
672 multiple locations. Here are the adjusted parameters used in our mapping process: --local --rdg  
673 10,1 --rfg 10,1. The mapped reads with gaps or InDels at unexpected locations rather than the  
674 Cas9 cut sites were removed. This step filtered out approximately 1% of the total reads (Figure  
675 5-table supplement 2). The remaining reads were grouped based on the InDel size and whether  
676 the InDel overlaps with any of the PU.1 and C/EBP motifs. Tag counts were used as  
677 quantification of the signal intensity. InDel groups with less than 0.05% of the input reads were  
678 filtered out to reduce the low-intensity data. The effect of each InDel group on TF binding was  
679 computed by the odds ratio between TF ChIP-seq tags and input sample ChIP-seq tags: (# TF  
680 tags for an InDel group / # the rest of TF tags) / (# input tags for the same InDel group / # the rest  
681 of input tags).

682

### 683 **Data and code availability**

684 All sequencing data generated from this study have been made available by deposition in the  
685 GEO database: GSE178080. All raw tag counts are available in Figure 5-source data 1. The  
686 UCSC genome browser was used to visualize sequencing data. The codes for data analysis and



687 the processed files of ENCODE data are available on our Github repository:

688 [https://github.com/zeyang-shen/spacing\\_pipeline](https://github.com/zeyang-shen/spacing_pipeline).

689

## 690 **Acknowledgements**

691 The authors would like to thank J. Collier for technical assistance, the IGM core for library  
692 sequencing, L. Van Ael for assistance with manuscript preparation. These studies were supported  
693 by NIH grants DK091183 and HL147835 and a Leducq Transatlantic Network grant 16CVD01  
694 to CKG. TAP was supported by NIH grant T32DK007044. MAH was supported by a Rubicon  
695 grant from the Netherlands Organization for Scientific Research and postdoctoral grants from the  
696 Amsterdam Cardiovascular Sciences Institute and the American Heart Association.

697

## 698 **Competing interests**

699 None declared

## 700 **References**

- 701 Behera, V., Evans, P., Face, C. J., Hamagami, N., Sankaranarayanan, L., Keller, C. A., Giardine,  
702 B., Tan, K., Hardison, R. C., Shi, J., & Blobel, G. A. (2018). Exploiting genetic variation to  
703 uncover rules of transcription factor binding and chromatin accessibility. *Nature*  
704 *Communications*, 9(1). <https://doi.org/10.1038/s41467-018-03082-6>
- 705 Cock, P. J. A., Antao, T., Chang, J. T., Chapman, B. A., Cox, C. J., Dalke, A., Friedberg, I.,  
706 Hamelryck, T., Kauff, F., Wilczynski, B., & De Hoon, M. J. L. (2009). Biopython: Freely  
707 available Python tools for computational molecular biology and bioinformatics.  
708 *Bioinformatics*, 25(11), 1422–1423. <https://doi.org/10.1093/bioinformatics/btp163>
- 709 Creighton, M. P., Cheng, A. W., Welstead, G. G., Kooistra, T., Carey, B. W., Steine, E. J.,  
710 Hanna, J., Lodato, M. A., Frampton, G. M., Sharp, P. A., Boyer, L. A., Young, R. A., &  
711 Jaenisch, R. (2010). Histone H3K27ac separates active from poised enhancers and predicts  
712 developmental state. *Proceedings of the National Academy of Sciences of the United States*  
713 *of America*, 107(50), 21931–21936. <https://doi.org/10.1073/pnas.1016071107>
- 714 Davis, C. A., Hitz, B. C., Sloan, C. A., Chan, E. T., Davidson, J. M., Gabdank, I., Hilton, J. A.,  
715 Jain, K., Baymuradov, U. K., Narayanan, A. K., Onate, K. C., Graham, K., Miyasato, S. R.,  
716 Dreszer, T. R., Strattan, J. S., Jolanki, O., Tanaka, F. Y., & Cherry, J. M. (2018). The  
717 Encyclopedia of DNA elements (ENCODE): Data portal update. *Nucleic Acids Research*,  
718 46(D1), D794–D801. <https://doi.org/10.1093/nar/gkx1081>
- 719 Deplancke, B., Alpern, D., & Gardeux, V. (2016). The Genetics of Transcription Factor DNA  
720 Binding Variation. *Cell*, 166(3), 538–554. <https://doi.org/10.1016/j.cell.2016.07.012>
- 721 Dobin, A., Davis, C. A., Schlesinger, F., Drenkow, J., Zaleski, C., Jha, S., Batut, P., Chaisson,  
722 M., & Gingeras, T. R. (2013). STAR: ultrafast universal RNA-seq aligner. *Bioinformatics*,  
723 29(1), 15–21. <https://doi.org/10.1093/bioinformatics/bts635>
- 724 Farh, K. K. H., Marson, A., Zhu, J., Kleinewietfeld, M., Housley, W. J., Beik, S., Shores, N.,  
725 Whitton, H., Ryan, R. J. H., Shishkin, A. A., Hatan, M., Carrasco-Alfonso, M. J., Mayer,  
726 D., Luckey, C. J., Patsopoulos, N. A., De Jager, P. L., Kuchroo, V. K., Epstein, C. B., Daly,  
727 M. J., ... Bernstein, B. E. (2015). Genetic and epigenetic fine mapping of causal  
728 autoimmune disease variants. *Nature*, 518(7539), 337–343.  
729 <https://doi.org/10.1038/nature13835>
- 730 Farley, E. K., Olson, K. M., Zhang, W., Brandt, A. J., Rokhsar, D. S., & Levine, M. S. (2015).

- 731 Suboptimization of developmental enhancers. *Science*, 350(6258), 325–328.  
732 <https://doi.org/10.1126/science.aac6948>
- 733 Fonseca, G. J., Tao, J., Westin, E. M., Duttke, S. H., Spann, N. J., Strid, T., Shen, Z., Stender, J.  
734 D., Sakai, M., Link, V. M., Benner, C., & Glass, C. K. (2019). Diverse motif ensembles  
735 specify non-redundant DNA binding activities of AP-1 family members in macrophages.  
736 *Nature Communications*, 10(1), 414. <https://doi.org/10.1038/s41467-018-08236-0>
- 737 Fornes, O., Castro-Mondragon, J. A., Khan, A., Van Der Lee, R., Zhang, X., Richmond, P. A.,  
738 Modi, B. P., Correard, S., Gheorghe, M., Baranašić, D., Santana-Garcia, W., Tan, G.,  
739 Chèneby, J., Ballester, B., Parcy, F., Sandelin, A., Lenhard, B., Wasserman, W. W., &  
740 Mathelier, A. (2020). JASPAR 2020: Update of the open-Access database of transcription  
741 factor binding profiles. *Nucleic Acids Research*, 48(D1), D87–D92.  
742 <https://doi.org/10.1093/nar/gkz1001>
- 743 Grossman, S. R., Zhang, X., Wang, L., Engreitz, J., Melnikov, A., Rogov, P., Tewhey, R.,  
744 Isakova, A., Deplancke, B., Bernstein, B. E., Mikkelsen, T. S., & Lander, E. S. (2017).  
745 Systematic dissection of genomic features determining transcription factor binding and  
746 enhancer function. *Proceedings of the National Academy of Sciences of the United States of*  
747 *America*, 114(7), E1291–E1300. <https://doi.org/10.1073/pnas.1621150114>
- 748 Heinz, S., Benner, C., Spann, N., Bertolino, E., Lin, Y. C., Laslo, P., Cheng, J. X., Murre, C.,  
749 Singh, H., & Glass, C. K. (2010). Simple Combinations of Lineage-Determining  
750 Transcription Factors Prime cis-Regulatory Elements Required for Macrophage and B Cell  
751 Identities. *Molecular Cell*, 38(4), 576–589. <https://doi.org/10.1016/j.molcel.2010.05.004>
- 752 Heinz, S., Romanoski, C. E., Benner, C., Allison, K. A., Kaikkonen, M. U., Orozco, L. D., &  
753 Glass, C. K. (2013). Effect of natural genetic variation on enhancer selection and function.  
754 *Nature*, 503, 487. <https://doi.org/10.1038/nature12615>
- 755 Heinz, S., Romanoski, C. E., Benner, C., & Glass, C. K. (2015). The selection and function of  
756 cell type-specific enhancers. *Nature Reviews Molecular Cell Biology*, 16(3), 144–154.  
757 <https://doi.org/10.1038/nrm3949>
- 758 Hoeksema, M. A., Shen, Z., Holtman, I. R., Zheng, A., Spann, N. J., Cobo, I., Gymrek, M., &  
759 Glass, C. K. (2021). Mechanisms underlying divergent responses of genetically distinct  
760 macrophages to IL-4. *Science Advances*, 7(25), eabf9808.  
761 <https://doi.org/10.1126/sciadv.abf9808>

- 762 Hogan, N. T., Whalen, M. B., Stolze, L. K., Hadeli, N. K., Lam, M. T., Springstead, J. R., Glass,  
763 C. K., & Romanoski, C. E. (2017). Transcriptional networks specifying homeostatic and  
764 inflammatory programs of gene expression in human aortic endothelial cells. *ELife*, *6*(Cvd),  
765 1–28. <https://doi.org/10.7554/eLife.22536>
- 766 Hu, H., Miao, Y.-R., Jia, L.-H., Yu, Q.-Y., Zhang, Q., & Guo, A.-Y. (2019). AnimalTFDB 3.0: a  
767 comprehensive resource for annotation and prediction of animal transcription factors.  
768 *Nucleic Acids Research*, *47*(D1), D33–D38. <https://doi.org/10.1093/nar/gky822>
- 769 Jiang, P., & Singh, M. (2014). CCAT: Combinatorial Code Analysis Tool for transcriptional  
770 regulation. *Nucleic Acids Research*, *42*(5), 2833–2847. <https://doi.org/10.1093/nar/gkt1302>
- 771 Jolma, A., Yin, Y., Nitta, K. R., Dave, K., Popov, A., Taipale, M., Enge, M., Kivioja, T.,  
772 Morgunova, E., & Taipale, J. (2015). DNA-dependent formation of transcription factor  
773 pairs alters their binding specificity. *Nature*, *527*(7578), 384–388.  
774 <https://doi.org/10.1038/nature15518>
- 775 Karczewski, K. J., Francioli, L. C., Tiao, G., Cummings, B. B., Alföldi, J., Wang, Q., Collins, R.  
776 L., Laricchia, K. M., Ganna, A., Birnbaum, D. P., Gauthier, L. D., Brand, H., Solomonson,  
777 M., Watts, N. A., Rhodes, D., Singer-Berk, M., England, E. M., Seaby, E. G., Kosmicki, J.  
778 A., ... Consortium, G. A. D. (2020). The mutational constraint spectrum quantified from  
779 variation in 141,456 humans. *Nature*, *581*(7809), 434–443. [https://doi.org/10.1038/s41586-](https://doi.org/10.1038/s41586-020-2308-7)  
780 [020-2308-7](https://doi.org/10.1038/s41586-020-2308-7)
- 781 Keane, T. M., Goodstadt, L., Danecek, P., White, M. A., Wong, K., Yalcin, B., Heger, A., Agam,  
782 A., Slater, G., Goodson, M., Furlotte, N. A., Eskin, E., Nellåker, C., Whitley, H., Cleak, J.,  
783 Janowitz, D., Hernandez-Pliego, P., Edwards, A., Belgard, T. G., ... Adams, D. J. (2011).  
784 Mouse genomic variation and its effect on phenotypes and gene regulation. *Nature*,  
785 *477*(7364), 289–294. <https://doi.org/10.1038/nature10413>
- 786 Labun, K., Montague, T. G., Krause, M., Torres Cleuren, Y. N., Tjeldnes, H., & Valen, E.  
787 (2019). CHOPCHOP v3: expanding the CRISPR web toolbox beyond genome editing.  
788 *Nucleic Acids Research*, *47*(W1), W171–W174. <https://doi.org/10.1093/nar/gkz365>
- 789 Langmead, B., & Salzberg, S. L. (2012). Fast gapped-read alignment with Bowtie 2. *Nature*  
790 *Methods*, *9*, 357. <https://doi.org/10.1038/nmeth.1923>
- 791 Lek, M., Karczewski, K. J., Minikel, E. V., Samocha, K. E., Banks, E., Fennell, T., O'Donnell-  
792 Luria, A. H., Ware, J. S., Hill, A. J., Cummings, B. B., Tukiainen, T., Birnbaum, D. P.,

- 793 Kosmicki, J. A., Duncan, L. E., Estrada, K., Zhao, F., Zou, J., Pierce-Hoffman, E.,  
794 Berghout, J., ... Consortium, E. A. (2016). Analysis of protein-coding genetic variation in  
795 60,706 humans. *Nature*, *536*(7616), 285–291. <https://doi.org/10.1038/nature19057>
- 796 Levkovitz, Y., & Baraban, J. M. (2002). A Dominant Negative Egr Inhibitor Blocks Nerve  
797 Growth Factor-Induced Neurite Outgrowth by Suppressing c-Jun Activation: Role of an  
798 Egr/c-Jun Complex. *Journal of Neuroscience*, *22*(10), 3845–3854.  
799 <https://doi.org/10.1523/jneurosci.22-10-03845.2002>
- 800 Li, Q., Brown, J. B., Huang, H., & Bickel, P. J. (2011). Measuring reproducibility of high-  
801 throughput experiments. *Annals of Applied Statistics*, *5*(3), 1752–1779.  
802 <https://doi.org/10.1214/11-AOAS466>
- 803 Link, V. M., Duttke, S. H., Chun, H. B., Holtman, I. R., Westin, E., Hoeksema, M. A., Abe, Y.,  
804 Skola, D., Romanoski, C. E., Tao, J., Fonseca, G. J., Troutman, T. D., Spann, N. J., Strid,  
805 T., Sakai, M., Yu, M., Hu, R., Fang, R., Metzler, D., ... Glass, C. K. (2018). Analysis of  
806 Genetically Diverse Macrophages Reveals Local and Domain-wide Mechanisms that  
807 Control Transcription Factor Binding and Function. *Cell*, *173*(7), 1796-1809.e17.  
808 <https://doi.org/10.1016/j.cell.2018.04.018>
- 809 Link, V. M., Romanoski, C. E., Metzler, D., & Glass, C. K. (2018). MMARGE: Motif mutation  
810 analysis for regulatory genomic elements. *Nucleic Acids Research*, *46*(14), 7006–7021.  
811 <https://doi.org/10.1093/nar/gky491>
- 812 Lis, M., & Walther, D. (2016). The orientation of transcription factor binding site motifs in gene  
813 promoter regions: Does it matter? *BMC Genomics*, *17*(1), 1–21.  
814 <https://doi.org/10.1186/s12864-016-2549-x>
- 815 MacArthur, J., Bowler, E., Cerezo, M., Gil, L., Hall, P., Hastings, E., Junkins, H., McMahon, A.,  
816 Milano, A., Morales, J., MayPendlington, Z., Welter, D., Burdett, T., Hindorff, L., Flicek,  
817 P., Cunningham, F., & Parkinson, H. (2017). The new NHGRI-EBI Catalog of published  
818 genome-wide association studies (GWAS Catalog). *Nucleic Acids Research*, *45*(D1), D896–  
819 D901. <https://doi.org/10.1093/nar/gkw1133>
- 820 Macián, F., López-Rodríguez, C., & Rao, A. (2001). Partners in transcription: NFAT and AP-1.  
821 *Oncogene*, *20*(19), 2476–2489. <https://doi.org/10.1038/sj.onc.1204386>
- 822 Menoret, D., Santolini, M., Fernandes, I., Spokony, R., Zanet, J., Gonzalez, I., Latapie, Y.,  
823 Ferrer, P., Rouault, H., White, K. P., Besse, P., Hakim, V., Aerts, S., Payre, F., & Plaza, S.

- 824 (2013). Genome-wide analyses of Shavenbaby target genes reveals distinct features of  
825 enhancer organization. *Genome Biology*, *14*(8), R86. [https://doi.org/10.1186/gb-2013-14-8-](https://doi.org/10.1186/gb-2013-14-8-r86)  
826 [r86](https://doi.org/10.1186/gb-2013-14-8-r86)
- 827 Morgunova, E., & Taipale, J. (2017). Structural perspective of cooperative transcription factor  
828 binding. *Current Opinion in Structural Biology*, *47*, 1–8.  
829 <https://doi.org/10.1016/j.sbi.2017.03.006>
- 830 Nakashima, A., Ota, A., & Sabban, E. L. (2003). Interactions between Egr1 and AP1 factors in  
831 regulation of tyrosine hydroxylase transcription. *Molecular Brain Research*, *112*(1–2), 61–  
832 69. [https://doi.org/10.1016/S0169-328X\(03\)00047-0](https://doi.org/10.1016/S0169-328X(03)00047-0)
- 833 Nandi, S., Blais, A., & Ioshikhes, I. (2013). Identification of cis-regulatory modules in promoters  
834 of human genes exploiting mutual positioning of transcription factors. *Nucleic Acids*  
835 *Research*, *41*(19), 8822–8841. <https://doi.org/10.1093/nar/gkt578>
- 836 Ng, F. S. L., Schütte, J., Ruau, D., Diamanti, E., Hannah, R., Kinston, S. J., & Göttgens, B.  
837 (2014). Constrained transcription factor spacing is prevalent and important for  
838 transcriptional control of mouse blood cells. *Nucleic Acids Research*, *42*(22), 13513–13524.  
839 <https://doi.org/10.1093/nar/gku1254>
- 840 Panne, D. (2008). The enhanceosome. *Current Opinion in Structural Biology*, *18*(2), 236–242.  
841 <https://doi.org/10.1016/j.sbi.2007.12.002>
- 842 Reményi, A., Lins, K., Nissen, L. J., Reinbold, R., Schöler, H. R., & Wilmanns, M. (2003).  
843 Crystal structure of a POU/HMG/DNA ternary complex suggests differential assembly of  
844 Oct4 and Sox2 on two enhancers. *Genes and Development*, *17*(16), 2048–2059.  
845 <https://doi.org/10.1101/gad.269303>
- 846 Rodda, D. J., Chew, J. L., Lim, L. H., Loh, Y. H., Wang, B., Ng, H. H., & Robson, P. (2005).  
847 Transcriptional regulation of Nanog by OCT4 and SOX2. *Journal of Biological Chemistry*,  
848 *280*(26), 24731–24737. <https://doi.org/10.1074/jbc.M502573200>
- 849 Shen, Z., Hoeksema, M. A., Ouyang, Z., Benner, C., & Glass, C. K. (2020). MAGGIE:  
850 leveraging genetic variation to identify DNA sequence motifs mediating transcription factor  
851 binding and function. *Bioinformatics (Oxford, England)*, *36*(1), i84–i92.  
852 <https://doi.org/10.1093/bioinformatics/btaa476>
- 853 Slattery, M., Zhou, T., Yang, L., Dantas Machado, A. C., Gordân, R., & Rohs, R. (2014).  
854 Absence of a simple code: How transcription factors read the genome. *Trends in*



855 *Biochemical Sciences*, 39(9), 381–399. <https://doi.org/10.1016/j.tibs.2014.07.002>

856 Smith, R. P., Taher, L., Patwardhan, R. P., Kim, M. J., Inoue, F., Shendure, J., Ovcharenko, I., &  
857 Ahituv, N. (2013). Massively parallel decoding of mammalian regulatory sequences  
858 supports a flexible organizational model. *Nature Genetics*, 45(9), 1021–1028.  
859 <https://doi.org/10.1038/ng.2713>

860 Sönmezer, C., Kleinendorst, R., Imanci, D., Barzaghi, G., Villacorta, L., Schübeler, D., Benes,  
861 V., Molina, N., & Krebs, A. R. (2021). Molecular Co-occupancy Identifies Transcription  
862 Factor Binding Cooperativity In Vivo. *Molecular Cell*, 81(2), 255-267.e6.  
863 <https://doi.org/10.1016/j.molcel.2020.11.015>

864 Stolze, L. K., Conklin, A. C., Whalen, M. B., López Rodríguez, M., Öunap, K., Selvarajan, I.,  
865 Toropainen, A., Örd, T., Li, J., Eshghi, A., Solomon, A. E., Fang, Y., Kaikkonen, M. U., &  
866 Romanoski, C. E. (2020). Systems Genetics in Human Endothelial Cells Identifies Non-  
867 coding Variants Modifying Enhancers, Expression, and Complex Disease Traits. *American*  
868 *Journal of Human Genetics*, 106(6), 748–763. <https://doi.org/10.1016/j.ajhg.2020.04.008>

869 Sullivan, G. M., & Feinn, R. (2012). Using Effect Size—or Why the P Value Is Not Enough .  
870 *Journal of Graduate Medical Education*, 4(3), 279–282. [https://doi.org/10.4300/jgme-d-12-](https://doi.org/10.4300/jgme-d-12-00156.1)  
871 [00156.1](https://doi.org/10.4300/jgme-d-12-00156.1)

872 Visscher, P. M., Wray, N. R., Zhang, Q., Sklar, P., McCarthy, M. I., Brown, M. A., & Yang, J.  
873 (2017). 10 Years of GWAS Discovery: Biology, Function, and Translation. *American*  
874 *Journal of Human Genetics*, 101(1), 5–22. <https://doi.org/10.1016/j.ajhg.2017.06.005>

875 Wang, G. G., Calvo, K. R., Pasillas, M. P., Sykes, D. B., Häcker, H., & Kamps, M. P. (2006).  
876 Quantitative production of macrophages or neutrophils ex vivo using conditional Hoxb8.  
877 *Nature Methods*, 3(4), 287–293. <https://doi.org/10.1038/nmeth865>

878 Ward, L. D., & Kellis, M. (2012). Interpreting noncoding genetic variation in complex traits and  
879 human disease. *Nature Biotechnology*, 30(11), 1095–1106. <https://doi.org/10.1038/nbt.2422>

880 Zaret, K. S., & Carroll, J. S. (2011). Pioneer transcription factors: Establishing competence for  
881 gene expression. *Genes and Development*, 25(21), 2227–2241.  
882 <https://doi.org/10.1101/gad.176826.111>

883
